# Supplementary material for: Plasma osteopontin as a biomarker of Alzheimer’s disease and vascular cognitive impairment
Source: PubMed Central journal article supplement (PMC7889621; doi:10.1038/s41598-021-83601-6), 2021-02-17
Supplement: 41598_2021_83601_MOESM1_ESM.pdf [file 41598_2021_83601_MOESM1_ESM.pdf]

**Plasma osteopontin as a biomarker of Alzheimer's disease and vascular cognitive impairment**

Yuek Ling Chai, Joyce R. Chong, Ainiah R. Raquib, Xin Xu, Saima Hilal, Narayanaswamy  
Venketasubramanian, Boon Yeow Tan, Alan P. Kumar, Gautam Sethi, Christopher P. Chen,  
Mitchell K.P. Lai

**Supplementary Information**

## Chai et al. Supplementary Table 1: Summary of Neuropsychological Battery and Component Tests

| Cognitive Domain       | Component Test(s)                                                                                                                                                                  |
|------------------------|------------------------------------------------------------------------------------------------------------------------------------------------------------------------------------|
| i. Executive Function: | Frontal Assessment Battery [1]                                                                                                                                                     |
| ii. Attention:         | Digit Span, Visual Memory Span [2] and Auditory Detection [3]                                                                                                                      |
| iii. Language:         | Language: Modified Boston Naming Test [4] and Verbal Fluency [5]                                                                                                                   |
| iv. Visuomotor Speed:  | Symbol Digit Modality Test [6], Maze Task [7] and Digit Cancellation [8]                                                                                                           |
| v. Visuoconstruction:  | Weschler Memory Scale – Revised (WMS-R) Visual Reproduction Copy task [2], Clock Drawing [9] and Weschler Adult Intelligence Scale – Revised (WAIS-R) subtest of Block Design [10] |
| vi. Visual Memory:     | Picture Recall & Recognition Tasks, and WMS-R Visual Reproduction Recall & Recognition Task [2]                                                                                    |
| vii. Verbal Memory:    | Word List Recall & Recognition Tasks [11] and Story Recall Task                                                                                                                    |

### References

- Dubois B, Slachevsky A, Litvan I, Pillon B: **The FAB: a Frontal Assessment Battery at bedside.** *Neurology* 2000, **55**:1621-1626.
- Wechsler D: **Wechsler Memory Scale-Revised.** 3rd ed. San Antonio, TX: Jovanovich; 1997.
- Lewis RF, Rennick PM: **Manual for the Repeatable Cognitive Percpetual-Motor Battery.** Clinton Township, MI: Axon; 1979.
- Mack WJ, Freed DM, Williams BW, Henderson VW: **Boston Naming Test: shortened versions for use in Alzheimer's disease.** *Journal of Gerontology* 1992, **47**:P154-158.
- Isaacs B, Kennie AT: **The Set test as an aid to the detection of dementia in old people.** *The British Journal of Psychiatry: The Journal of Mental Science* 1973, **123**:467-470.
- Smith A: **Symbol Digit Modalities Test.** Los Angeles, CA: WPS Inc.; 1973.
- Porteus SD: **The Maze Test and Clinical Psychology.** Palo Alto, CA: Pacific Books; 1959.
- Diller L, Ben-Yishay Y, Gerstman LJ: **Studies in Cognition and Rehabilitation in Hemiplegia.** New York: New York University Medical Center Institute of Rehabilitation Medicine; 1974.
- Sunderland T, Hill JL, Mellow AM, Lawlor BA, Gundersheimer J, Newhouse PA, Grafman JH: **Clock drawing in Alzheimer's disease. A novel measure of dementia severity.** *Journal of the American Geriatrics Society* 1989, **37**:725-729.
- Wechsler D: **Wechsler Adult Intelligence Scale-Revised.** San Antonio, TX: Harcourt Brace Jovanovich; 1981.
- Sahadevan S, Tan NJ, Tan T, Tan S: **Cognitive testing of elderly Chinese people in Singapore: influence of education and age on normative scores.** *Age and Ageing* 1997, **26**:481-486.

**Chai et al. Supplementary Table 2: ROC analysis of plasma OPN for discriminating each diagnostic outcome from NCI (n=378)**

| <b>Model</b>      | <b>Diagnostic outcome</b> | <b>AUC (95% CI)</b> | <b>Sensitivity (95% CI)</b> | <b>Specificity (95% CI)</b> |
|-------------------|---------------------------|---------------------|-----------------------------|-----------------------------|
| <b>Unadjusted</b> | CIND without CeVD         | 0.50 (0.41 – 0.59)  | 26.6 (8.9 – 97.5)           | 87.5 (11.3 – 98.8)          |
|                   | CIND with CeVD            | 0.63 (0.54 – 0.71)  | 70.9 (30.4 – 88.6)          | 58.8 (35.0 – 92.5)          |
|                   | AD without CeVD           | 0.80 (0.71 – 0.88)  | 72.5 (55.0 – 92.5)          | 85.0 (60.0 – 93.8)          |
|                   | AD with CeVD              | 0.71 (0.63 – 0.80)  | 58.0 (39.1 – 87.0)          | 82.5 (48.8 – 95.0)          |
|                   | VaD                       | 0.73 (0.62 – 0.84)  | 64.5 (41.9 – 96.8)          | 83.8 (41.3 – 95.0)          |
| <b>Adjusted*</b>  | CIND without CeVD         | 0.68 (0.59 – 0.76)  | 59.5 (36.7 – 79.8)          | 76.3 (53.8 – 92.5)          |
|                   | CIND with CeVD            | 0.77 (0.70 – 0.84)  | 68.4 (53.2 – 93.7)          | 77.5 (46.3 – 90.0)          |
|                   | AD without CeVD           | 0.92 (0.86 – 0.97)  | 85.0 (72.5 – 97.5)          | 91.3 (76.3 – 97.5)          |
|                   | AD with CeVD              | 0.89 (0.84 – 0.95)  | 82.6 (71.0 – 92.8)          | 87.5 (78.7 – 96.3)          |
|                   | VaD                       | 0.91 (0.85 – 0.96)  | 90.3 (71.0 – 100)           | 81.3 (62.5 – 96.3)          |

ROC = Receiver operating characteristic, OPN = osteopontin, NCI = no cognitive impairment, CeVD = cerebrovascular disease, CIND = cognitive impairment no dementia, AD = Alzheimer’s disease, VaD = vascular dementia, AUC = area under curve, CI = confidence interval

\*Adjusted for age, education, APOE4 carrier status, hypertension, diabetes and cardiovascular disease.

**Chai et al. Supplementary Table 3: ROC analysis of plasma OPN for discriminating each diagnostic outcome from all other diagnoses (n=378)**

| <b>Model</b>      | <b>Diagnostic outcome</b> | <b>AUC (95% CI)</b> | <b>Sensitivity (95% CI)</b> | <b>Specificity (95% CI)</b> |
|-------------------|---------------------------|---------------------|-----------------------------|-----------------------------|
| <b>Unadjusted</b> | CIND without CeVD         | 0.51 (0.42 – 0.60)  | 29.1 (11.4 – 97.5)          | 86.3 (11.3 – 97.5)          |
|                   | CIND with CeVD            | 0.63 (0.55 – 0.72)  | 67.9 (30.9 – 87.7)          | 61.3 (37.5 – 92.5)          |
|                   | AD without CeVD           | 0.78 (0.69 – 0.86)  | 68.2 (50.0 – 93.2)          | 83.8 (53.8 – 93.8)          |
|                   | AD with CeVD              | 0.71 (0.63 – 0.80)  | 58.0 (39.1 – 88.4)          | 82.5 (46.2 – 95.0)          |
|                   | VaD                       | 0.73 (0.62 – 0.84)  | 64.5 (41.9 – 96.8)          | 83.8 (40.0 – 95.0)          |
| <b>Adjusted*</b>  | CIND without CeVD         | 0.71 (0.63 – 0.79)  | 62.0 (38.0 – 84.8)          | 76.3 (51.3 – 93.8)          |
|                   | CIND with CeVD            | 0.76 (0.68 – 0.83)  | 75.3 (55.6 – 95.1)          | 68.8 (42.5 – 86.3)          |
|                   | AD without CeVD           | 0.92 (0.87 – 0.97)  | 88.6 (75.0 – 97.7)          | 87.5 (74.8 – 96.3)          |
|                   | AD with CeVD              | 0.88 (0.82 – 0.94)  | 79.7 (63.8 – 92.8)          | 86.3 (71.3 – 96.3)          |
|                   | VaD                       | 0.91 (0.86 – 0.96)  | 93.6 (67.7 – 100)           | 77.5 (60.0 – 100)           |

ROC = Receiver operating characteristic, OPN = osteopontin, NCI = no cognitive impairment, CeVD = cerebrovascular disease, CIND = cognitive impairment no dementia, AD = Alzheimer's disease, VaD = vascular dementia, AUC = area under curve, CI = confidence interval

\*Adjusted for age, education, APOE4 carrier status, hypertension, diabetes and cardiovascular disease.
